# Supplementary material for: Local Immune Changes in Early Stages of Inflammation and Carcinogenesis Correlate with the Collagen Scaffold Changes of the Colon Mucosa
Source: MDPI journal article supplement (doi:10.3390/cancers13102463), 2021-05-18
Supplement: s1 [file s1]

# Supplementary Materials: Local Immune Changes in Early Stages of Inflammation and Carcinogenesis Correlate with the Collagen Scaffold Changes of the Colon Mucosa

Fabián Čaja, Dmitry Stakheev, Oleksandr Chernyavskiy, Lucie Kubinová, Jiří Křížan, Jiří Dvořák, Pavel Rossmann, Renata Štěpánková, Peter Makovický, Pavol Makovický, Veronika Vymetalková, Pavel Souček, Pavel Vodička, L'udmila Vodičková, Miroslav Levý and Luca E. Vannucci

**Figure S1.** Representative melting curves for the genes used in the study. The description of the procedure is reported at paragraph 2.3

*Ppia*

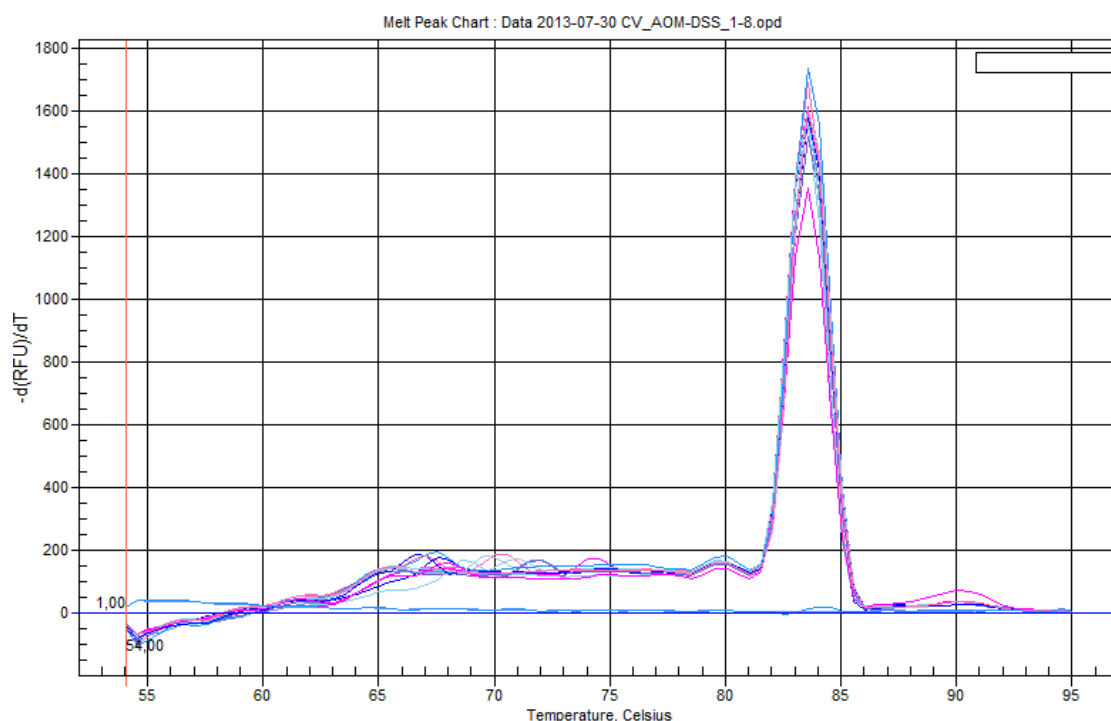

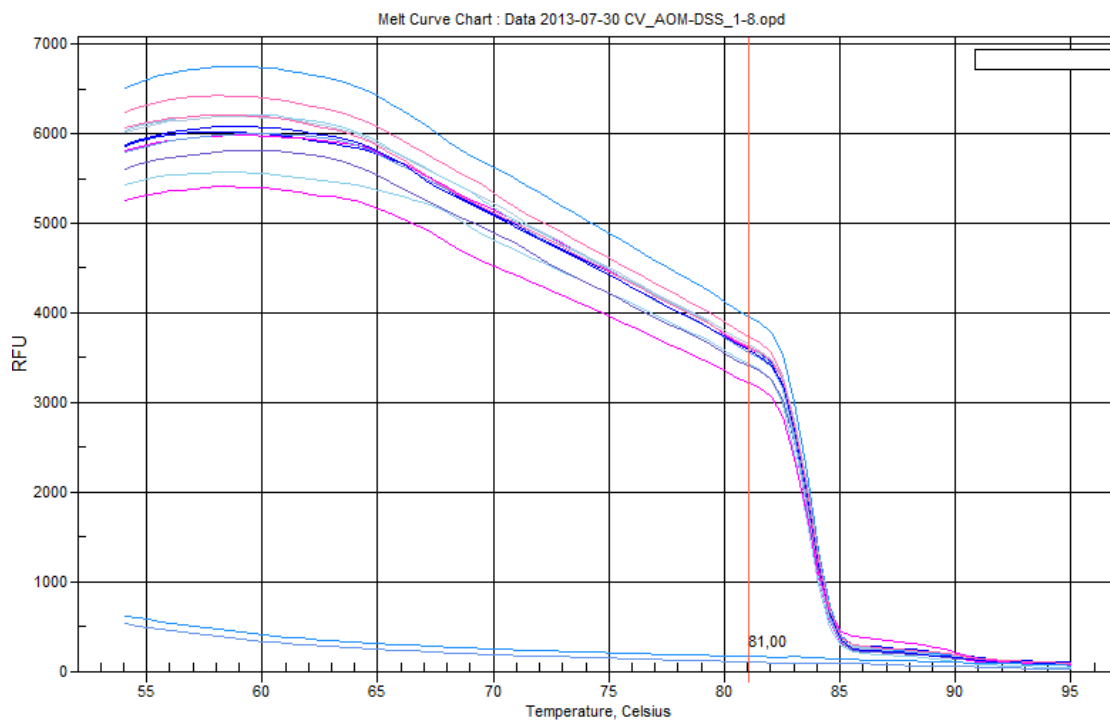

### II1a

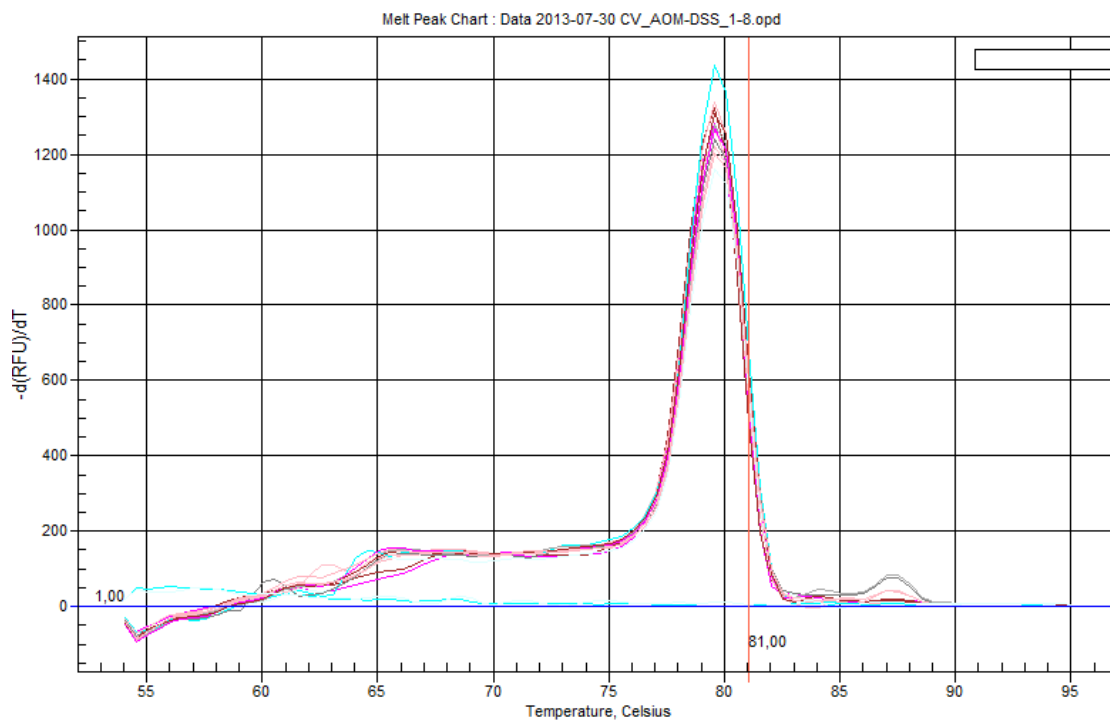

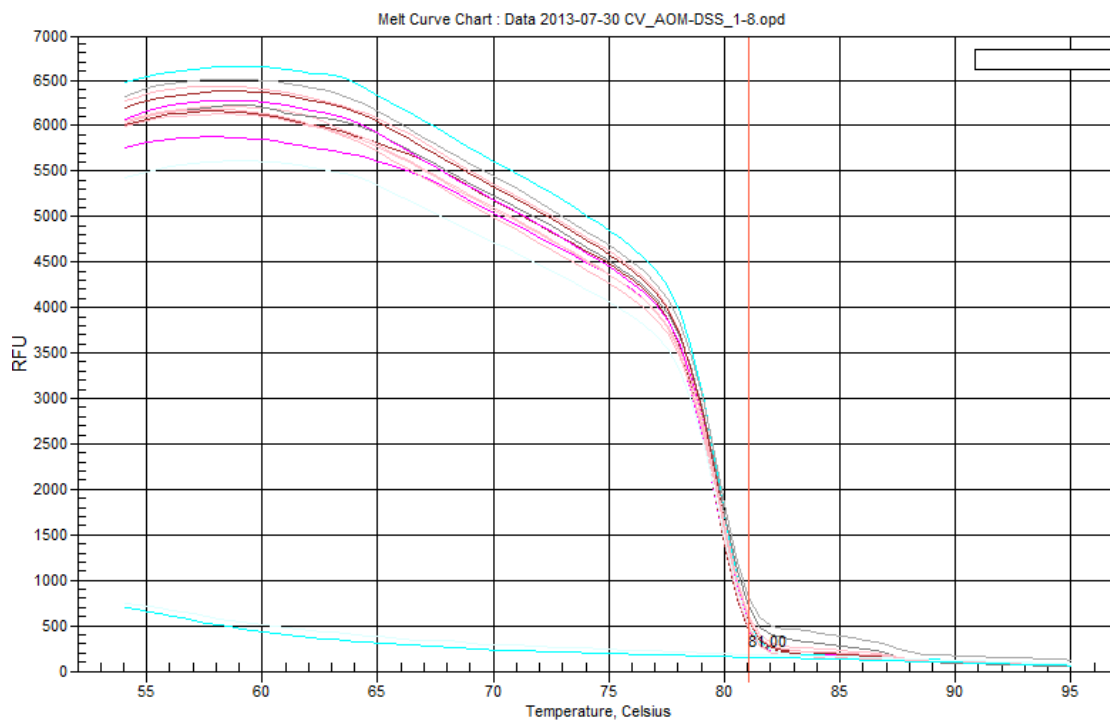

### II1b

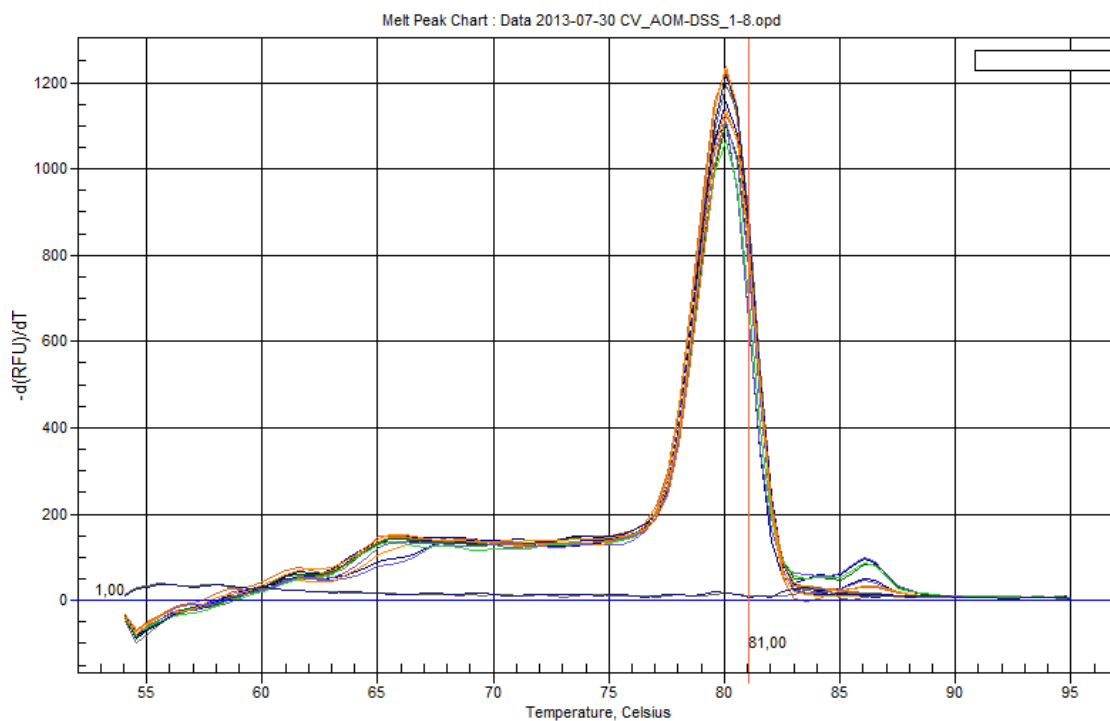

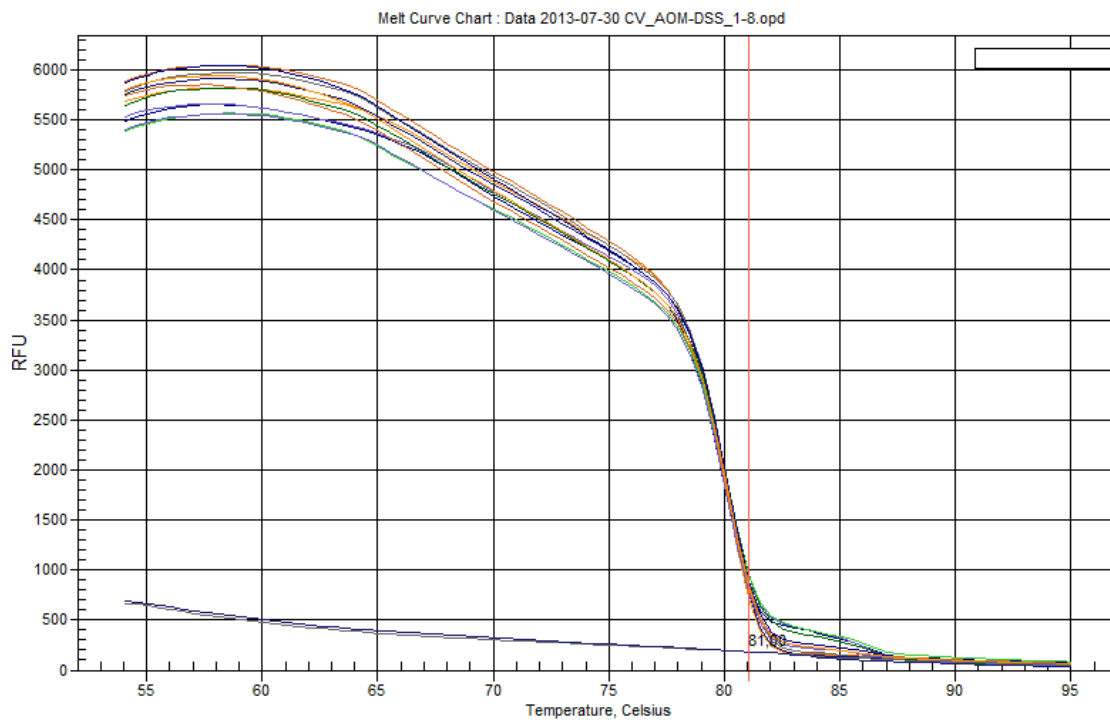*Ifng*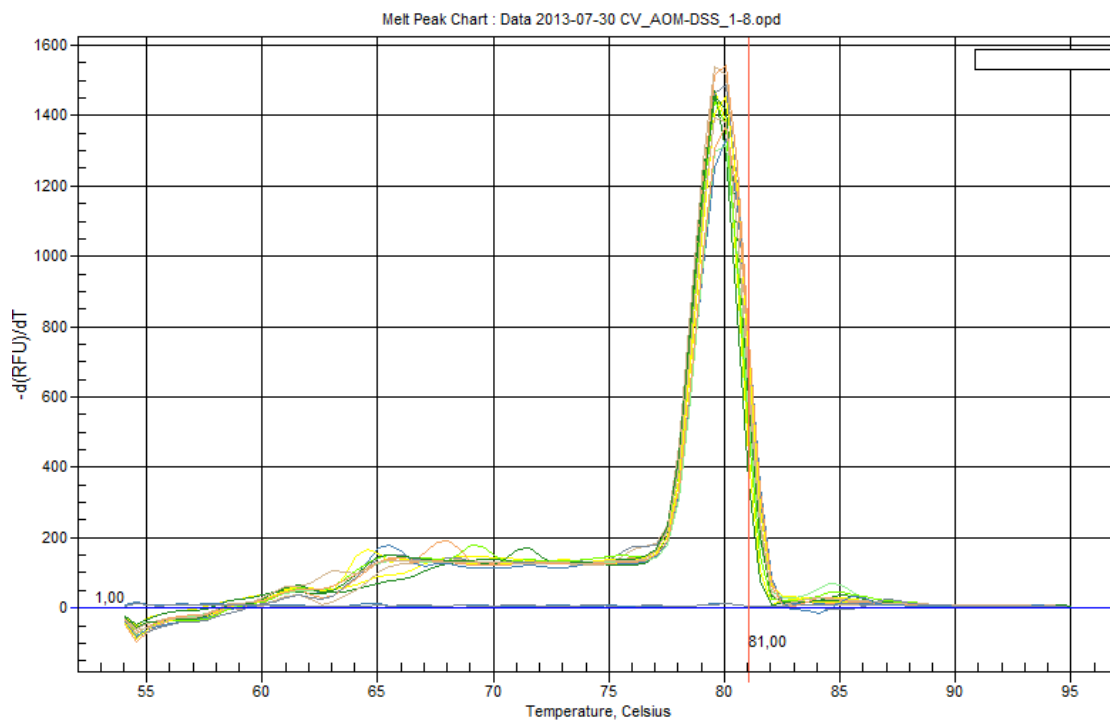

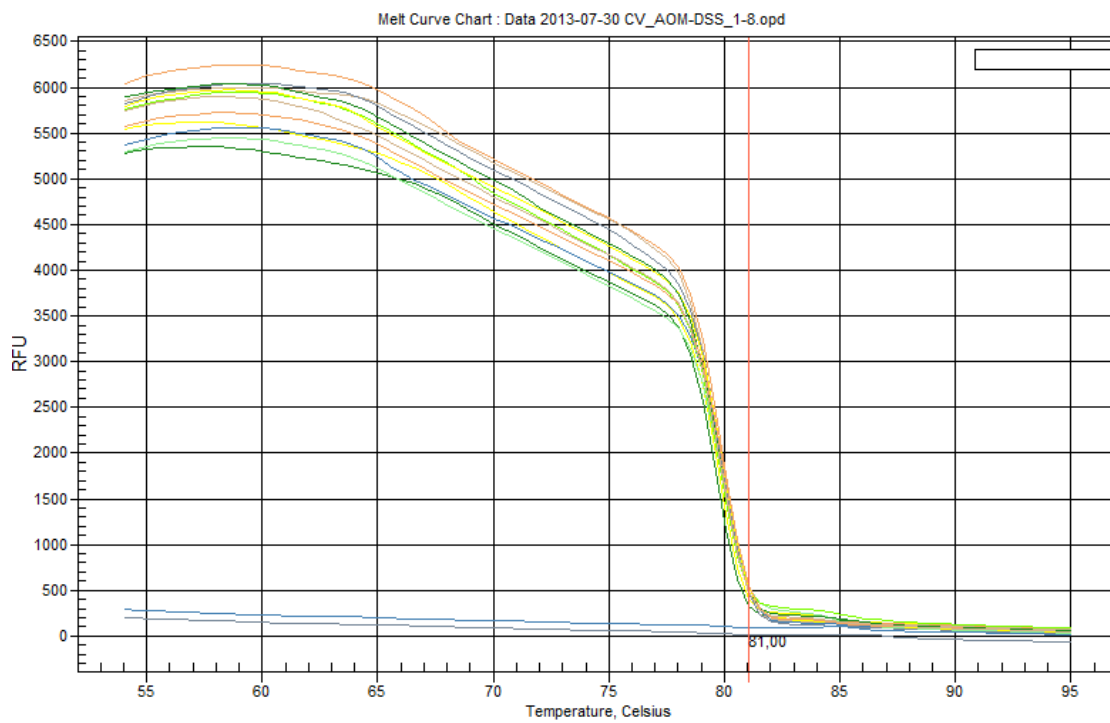*Tgfb1*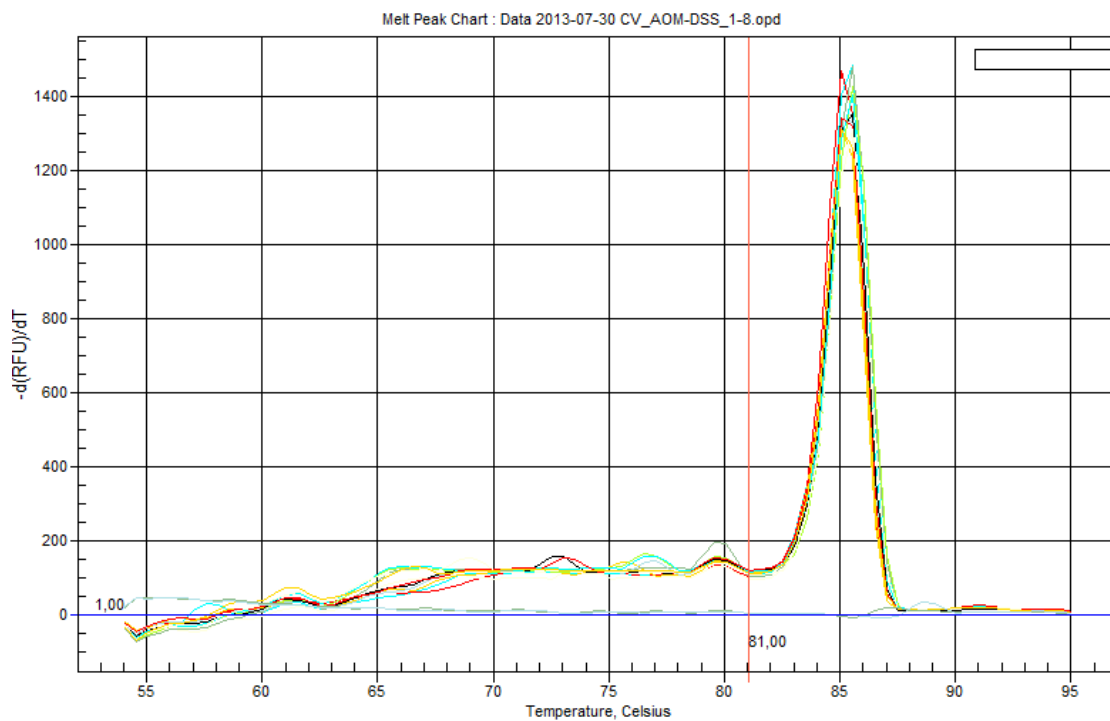

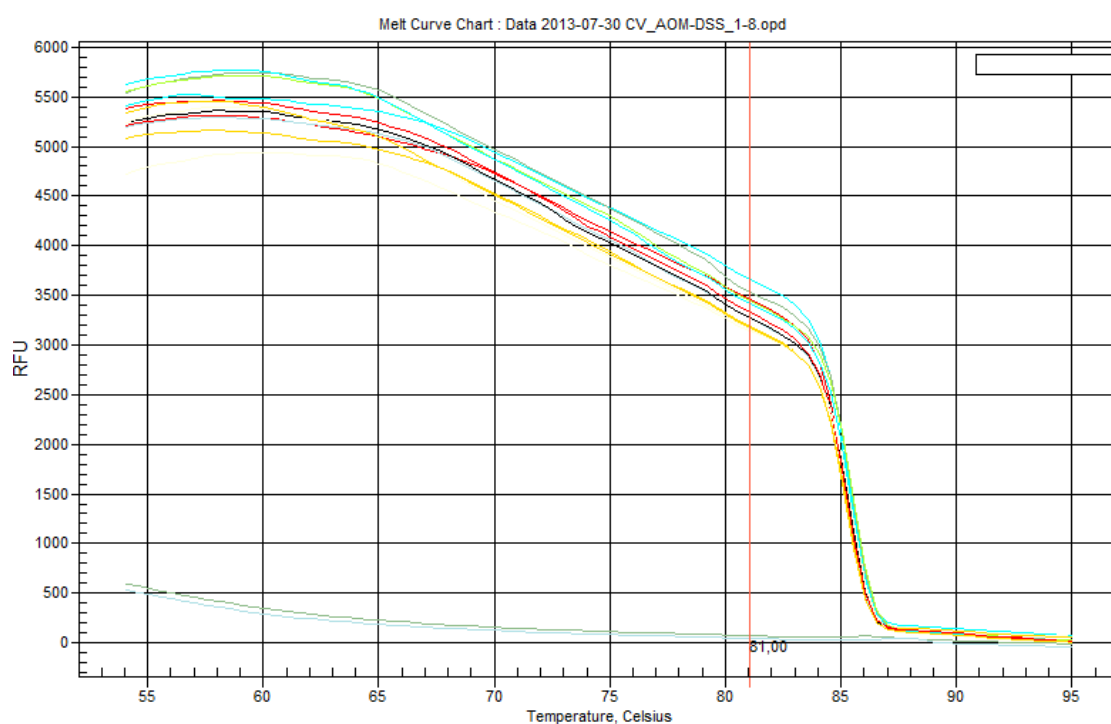

**Table S1.** Values of ELISA, PCR and imaging analysis statistical evaluations.

Differences in distributed variables between groups were compared by one-way ANOVA and subsequent Kruskal–Wallis test using GraphPad Prism™. Statistical significance was considered for  $p < 0.05$

### ELISA

p-value shown as comparison of treated rats with controls

| Protein       | Tissue | Treatment | p-value | Mean   | S.E.M. | N  |
|---------------|--------|-----------|---------|--------|--------|----|
| IL-1 $\alpha$ |        | control   | -       | 3047,0 | 229,2  | 47 |

|                |                    |         |         |        |        |    |
|----------------|--------------------|---------|---------|--------|--------|----|
|                | Left colon mucosa  | DSS     | 0,0132  | 2068,0 | 485,7  | 20 |
|                |                    | AOM     | <0,0001 | 971,8  | 194,1  | 15 |
|                | Right colon mucosa | control | -       | 3438,0 | 299,4  | 31 |
|                |                    | DSS     | 0,0013  | 1501,0 | 300,4  | 15 |
|                |                    | AOM     | 0,0013  | 1328,0 | 288,6  | 11 |
|                | MLN                | control | -       | 878,3  | 123,0  | 26 |
|                |                    | DSS     | >0,9999 | 1010,0 | 397,9  | 6  |
|                |                    | AOM     | 0,958   | 2021,0 | 1854,0 | 4  |
|                | Spleen             | control | -       | 1846,0 | 719,8  | 26 |
|                |                    | DSS     | 0,4471  | 678,3  | 280,4  | 8  |
|                |                    | AOM     | >0,9999 | 890,3  | 270,5  | 6  |
| IL-6           | Left colon mucosa  | control | -       | 1405,0 | 228,1  | 55 |
|                |                    | DSS     | 0,0223  | 4945,0 | 1567,0 | 19 |
|                |                    | AOM     | >0,9999 | 2030,0 | 1051,0 | 9  |
|                | Right colon mucosa | control | -       | 1387,0 | 291,6  | 29 |
|                |                    | DSS     | 0,624   | 3908,0 | 1561,0 | 17 |
|                |                    | AOM     | 0,5336  | 2895,0 | 1527,0 | 6  |
|                | MLN                | control | -       | 188,5  | 88,4   | 30 |
|                |                    | DSS     | 0,1074  | 357,9  | 179,2  | 6  |
|                |                    | AOM     | 0,0441  | 230,4  | 36,0   | 4  |
|                | Spleen             | control | -       | 419,4  | 175,8  | 26 |
|                |                    | DSS     | >0,9999 | 110,1  | 110,1  | 7  |
|                |                    | AOM     | 0,3964  | 270,9  | 117,1  | 4  |
| TGF- $\beta$ 1 | Left colon mucosa  | control | -       | 342,6  | 70,6   | 67 |
|                |                    | DSS     | 0,0005  | 21,9   | 17,9   | 27 |
|                |                    | AOM     | 0,0157  | 0,0    | 0,0    | 9  |
|                | Right colon mucosa | control | -       | 196,2  | 72,9   | 60 |
|                |                    | DSS     | >0,9999 | 152,6  | 65,1   | 18 |
|                |                    | AOM     | >0,9999 | 6,3    | 6,3    | 8  |
|                | MLN                | control | -       | 909,9  | 213,6  | 39 |
|                |                    | DSS     | >0,9999 | 772,4  | 441,7  | 6  |
|                |                    | AOM     | >0,9999 | 305,1  | 259,2  | 4  |
|                | Spleen             | control | -       | 6818,0 | 914,3  | 47 |
|                |                    | DSS     | 0,3019  | 4104,0 | 971,5  | 16 |
|                |                    | AOM     | 0,5115  | 4340,0 | 2305,0 | 6  |
| IFN- $\gamma$  | Left colon mucosa  | control | -       | 1758,0 | 252,7  | 51 |
|                |                    | DSS     | 0,3592  | 1878,0 | 715,5  | 14 |
|                |                    | AOM     | 0,0372  | 0,0    | 0,0    | 3  |
|                | Right colon mucosa | control | -       | 1438,0 | 236,3  | 26 |
|                |                    | DSS     | 0,9237  | 1856,0 | 988,9  | 8  |
|                |                    | AOM     | 0,1589  | 150,0  | 150,0  | 3  |

|  |        |         |         |        |       |    |
|--|--------|---------|---------|--------|-------|----|
|  | MLN    | control | -       | 874,3  | 324,7 | 22 |
|  |        | DSS     | 0,1085  | 4013,0 | 337,5 | 2  |
|  |        | AOM     | 0,5726  | 0,0    | 0,0   | 3  |
|  | Spleen | control | -       | 2899,0 | 972,4 | 20 |
|  |        | DSS     | >0,9999 | 2344,0 | 312,5 | 2  |
|  |        | AOM     | 0,8326  | 0,0    | 0,0   | 2  |

## PCR

p-value shown as comparison of treated rats with controls

| Gene         | Tissue             | Treatment | p-value | Mean   | S.E.M. | N |
|--------------|--------------------|-----------|---------|--------|--------|---|
| <i>Il1a</i>  | Left colon mucosa  | control   | -       | 11,950 | 4,0760 | 4 |
|              |                    | DSS       | 0,2184  | 0,851  | 0,3740 | 8 |
|              |                    | AOM       | 0,1361  | 0,345  | 0,0850 | 9 |
|              | Right colon mucosa | control   | -       | 11,070 | 1,3810 | 3 |
|              |                    | DSS       | 0,0053  | 0,257  | 0,0663 | 9 |
|              |                    | AOM       | 0,1967  | 0,598  | 0,1265 | 8 |
| <i>Il1b</i>  | Left colon mucosa  | control   | -       | 1,093  | 0,1881 | 4 |
|              |                    | DSS       | 0,2085  | 0,771  | 0,3318 | 6 |
|              |                    | AOM       | 0,0458  | 0,410  | 0,0351 | 7 |
|              | Right colon mucosa | control   | -       | 0,976  | 0,1223 | 3 |
|              |                    | DSS       | 0,3169  | 0,576  | 0,0605 | 3 |
|              |                    | AOM       | >0,9999 | 1,104  | 0,1937 | 4 |
| <i>Ifng</i>  | Left colon mucosa  | control   | -       | 1,847  | 0,1390 | 2 |
|              |                    | DSS       | 0,1506  | 0,296  | 0,1084 | 7 |
|              |                    | AOM       | 0,0725  | 0,183  | 0,0481 | 8 |
|              | Right colon mucosa | control   | -       | 1,896  | 0,1658 | 2 |
|              |                    | DSS       | 0,0193  | 0,236  | 0,0562 | 8 |
|              |                    | AOM       | 0,3099  | 0,574  | 0,1370 | 9 |
| <i>Tgfb1</i> | Left colon mucosa  | control   | -       | 2,657  | 0,8547 | 4 |
|              |                    | DSS       | 0,536   | 1,126  | 0,3089 | 7 |
|              |                    | AOM       | 0,0375  | 0,608  | 0,0749 | 7 |
|              | Right colon mucosa | control   | -       | 1,688  | 0,3139 | 3 |
|              |                    | DSS       | 0,1307  | 0,959  | 0,1438 | 8 |
|              |                    | AOM       | 0,1276  | 0,960  | 0,1379 | 9 |

## IMAGING



p-value shown as comparison of treated  
rats with controls

| Parameter                                 | Treatment | p-value | Mean    | S.E.M.  | N   |
|-------------------------------------------|-----------|---------|---------|---------|-----|
| skewness                                  | control   | -       | 2,342   | 0,0868  | 107 |
|                                           | DSS       | <0,0001 | 1,435   | 0,0499  | 104 |
|                                           | AOM       | <0,0001 | 1,663   | 0,0894  | 72  |
| dist. between<br>centers of the<br>glands | control   | -       | 87,940  | 2,0070  | 136 |
|                                           | DSS       | 0,2742  | 81,370  | 1,6910  | 126 |
|                                           | AOM       | <0,0001 | 73,900  | 1,9650  | 77  |
| intercryptal space                        | control   | -       | 16,930  | 0,8036  | 126 |
|                                           | DSS       | 0,0004  | 22,010  | 1,1320  | 81  |
|                                           | AOM       | <0,0001 | 23,860  | 0,7971  | 216 |
| integrated density                        | control   | -       | 261,500 | 23,1800 | 130 |
|                                           | DSS       | <0,0001 | 492,000 | 34,7800 | 114 |
|                                           | AOM       | <0,0001 | 722,300 | 33,7100 | 216 |
